# Supplementary material
Source: PubMed Central journal article supplement (PMC3421181)
Supplement: 1209856109_pnas.201209856SI.pdf [file 1209856109_pnas.201209856SI.pdf]

# Supporting Information

Fan et al. 10.1073/pnas.1209856109

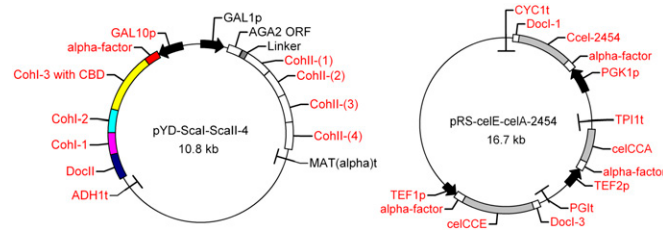

**Fig. S1.** Recombinant plasmids pYD-Scal-Scall-4 and pRS-celE-celA-2454 used in this study. The structures of pYD-Scal-Scall-1, pYD-Scal-Scall-2, and pYD-Scal-Scall-3 were similar to pYD-Scal-Scall-4. The only difference was that they had one, two, and three repeating CohIIs, respectively. Plasmid pYD-Scall-2 did not have miniscaffoldin I expression cassette, and its miniscaffoldin II had two repeating CohIIs. The structures of plasmids pRS-celE, pRS-celA, pRS-2454, pRS-celE-celA, pRS-celE-2454, and pRS-celA-2454 could be derived from pRS-celE-celA-2454 by removing proper gene expression cassettes. pET28-Scal, pET28-celA, and pET28-2454 were constructed based on pET28a. They were used for expression of miniscaffoldin I, celCCA, and Ccel\_2454 in *E. coli*. pETduet-celE was constructed based on pETduet-1 and for *E. coli* expression of celCCE. All of the plasmids pET28-Scal, pET28-celA, pET28-2454, and pETduet-celE used T7 promoter and T7 terminator, and  $\alpha$ -factor was not fused with genes. Yeast constitutive promoters (PGK1p, 750 bp; TEF1p, 412 bp; TEF2p, 560 bp) and the corresponding terminators (CYC1t, 249 bp; PGI, 401 bp; TPI1t, 401 bp) were PCR-amplified from the genomic DNA isolated from *S. cerevisiae* EB Y100. Galactose-inducible promoter (GAL10p, 491 bp) and the corresponding terminator (ADH1t, 324 bp) were amplified from pYES2 (Invitrogen). Yeast-secretion signal ( $\alpha$ -factor, 270 bp) was amplified from pPICZ $\alpha$ A (Invitrogen). Cellulases [celCCE without native dockerin, 2,403 bp; celCCA with native dockerin (DocI-2), 1,350 bp; Ccel\_2454, 2,133 bp] and CohI-2 (438 bp) were cloned from the genomic DNA isolated from *C. cellulolyticum* DSM 5812. DocI-3 (246 bp), CohI-3 with CBD (1,131 bp), DocII (492 bp), and CohII (522 bp) were amplified from the genomic DNA isolated from *C. thermocellum* ATCC 27405. DocI-1 (174 bp) and CohI-1 (414 bp) were amplified from the genomic DNA of *C. cellulovorans* DSM 3052. All of the primers are listed in Table S2–S7.

**Table S1. Summary of the recombinant *S. cerevisiae* EB Y100 and *E. coli* BL21 (DE3) used in this study**

| Strain                              | Plasmid(s)                              | Phenotype                                                                                              |
|-------------------------------------|-----------------------------------------|--------------------------------------------------------------------------------------------------------|
| EBY (control)                       | pYD1 and pRS425                         | No surface display (negative control)                                                                  |
| EBY (EA2-1)                         | pYD-Scal-Scall-1 and pRS-celE-celA-2454 | Displays trifunctional minicellulosome with one CohII on scaffoldin II                                 |
| EBY (EA2-2)                         | pYD-Scal-Scall-2 and pRS-celE-celA-2454 | Displays trifunctional minicellulosome with two CohIIs on scaffoldin II                                |
| EBY (EA2-3)                         | pYD-Scal-Scall-3 and pRS-celE-celA-2454 | Displays trifunctional minicellulosome with three CohIIs on scaffoldin II                              |
| EBY (EA2-4)                         | pYD-Scal-Scall-4 and pRS-celE-celA-2454 | Displays trifunctional minicellulosome with four CohIIs on scaffoldin II                               |
| EBY (E-2)                           | pYD-Scal-Scall-2 and pRS-celE           | Displays unifunctional minicellulosome with CBH activity and with two CohIIs on scaffoldin II          |
| EBY (A-2)                           | pYD-Scal-Scall-2 and pRS-celA           | Displays unifunctional minicellulosome with EG activity and with two CohIIs on scaffoldin II           |
| EBY (2454-2)                        | pYD-Scal-Scall-2 and pRS-2454           | Displays unifunctional minicellulosome with BGL activity and with two CohIIs on scaffoldin II          |
| EBY (EA-2)                          | pYD-Scal-Scall-2 and pRS-celE-celA      | Displays bifunctional minicellulosome with CBH and EG activities and with two CohIIs on scaffoldin II  |
| EBY (E2-2)                          | pYD-Scal-Scall-2 and pRS-celE-2454      | Displays bifunctional minicellulosome with CBH and BGL activities and with two CohIIs on scaffoldin II |
| EBY (A2-2)                          | pYD-Scal-Scall-2 and pRS-celA-2454      | Displays bifunctional minicellulosome with EG and BGL activities and with two CohIIs on scaffoldin II  |
| EBY (C <sub>4</sub> doc-2)          | pYD-Scal-Scall-2                        | Displays scaffoldin I and scaffoldin II with two CohIIs                                                |
| EBY [EA2-2 (-)]                     | pYD-Scall-2 and pRS-celE-celA-2454      | Displays trifunctional minicellulosome with two CohIIs on scaffoldin II and without scaffoldin I       |
| <i>E. coli</i> (C <sub>4</sub> doc) | pET28-Scal                              | Expression of miniscaffoldin I in <i>E. coli</i> BL21 (DE3)                                            |
| <i>E. coli</i> (E)                  | pETduet-celE                            | Expression of CBH in <i>E. coli</i> BL21 (DE3)                                                         |
| <i>E. coli</i> (A)                  | pET28-celA                              | Expression of EG in <i>E. coli</i> BL21 (DE3)                                                          |
| <i>E. coli</i> (2454)               | pET28-2454                              | Expression of BGL in <i>E. coli</i> BL21 (DE3)                                                         |

**Table S2. Primers used for constructing cellulase gene expression cassettes in pUC19**

| Name                          | Sequence                                              |
|-------------------------------|-------------------------------------------------------|
| $\alpha$ -factor-F            | CGGAATCCGATGAGATTTCTTCAATT                            |
| $\alpha$ -factor-R            | CCGAGCTCGAGCTTCAGCCTCTCTTTTC                          |
| PGK1p-F                       | CGGAATTCACGCACAGATATTATAACATC                         |
| PGK1p-R                       | CGGAATTCGTGTTTATATTTGTTGTAAGTAG                       |
| TEF1p-F                       | CGGAATTCATAGCTTCAAAATGTTTCTACTC                       |
| TEF1p-R                       | CGGAATTCCTTTGTAATTAAGCTTAGATTAG                       |
| TEF2p-F                       | CGGAATTCGGGCGTACTTACATATAG                            |
| TEF2p-R                       | CGGAATTCGTTTAGTTAATTATAGTTCGTTG                       |
| CYC1t-F                       | ACGCGTCGACATCATGTAATTAGTTATGTCAGCG                    |
| CYC1t-R                       | CCCAAGCTTGCAAATTAAGCCTTCGAG                           |
| PGIt-F                        | ACGCGTCGACAACAAATCGCTCTTAAATATATACC                   |
| PGIt-R                        | CCCAAGCTTGGTATACTGGAGGCTTCATGAGTTATG                  |
| TPI1t-F                       | GCTCTAGAGATTAATAAATATATAAAAAATATTATC                  |
| TPI1t-R                       | ACGCGTCGACCTATATAACAGTTGAAATTTGG                      |
| celCCA-pUC19-F                | CGGAGCTCCGCATCATCACCATCACCATTATGATGCTTCACTTATTCCGAATC |
| celCCA-pUC19-R                | TGCTCTAGATTAGTTGCTTGGAGCTTACTTACC                     |
| celCCE-pUC19-F                | TCCCCGGGGCATCATCACCATCACCATATAGGACAAGCATTGCCCCTT      |
| celCCE-pUC19-R                | ACGCGTCGACAGTTGGAGGAGTCACTGACCC                       |
| Ccel <sub>2454</sub> -pUC19-F | CGGAGCTCCGCATCATCACCATCACCATATGCAATACGATCAGATAGATAA   |
| Ccel <sub>2454</sub> -pUC19-R | ACGCGTCGACAGGCAAGAGCTATAGCTATCGGAA                    |
| DocI-1-F                      | ACGCGTCGACTTAAAGGTGATGTTAACTCTGATGC                   |
| DocI-1-R                      | ACGCGTCGACTTAAGCAAGAAGTCTTTCTTTAA                     |
| DocI-3-F                      | ACGCGTCGACTtcccggatatgacataataaag                     |
| DocI-3-R                      | ACGCGTCGACTTAGTCTTTGTACGGCAATG                        |

F, forward; R, reverse.

**Table S3. Primers used for shifting cellulase gene expression cassettes into pRS425**

| Name       | Sequence                                |
|------------|-----------------------------------------|
| M3-NotI-F  | ATAAGAATGCGCCCGCTAAAACGACGGCCAGT        |
| M3-NotI-R  | ATAAGAATGCGCCCGCAGATCTCAGGAAACAGCTATGAC |
| M3-BglII-F | GAAGATCTGTAACACGACGGCCAGT               |
| M3-BglII-R | GAAGATCTGCATGCCAGGAAACAGCTATGAC         |
| M3-SphI-F  | ACATGCATGCGTAAAACGACGGCCAGT             |
| M3-SphI-R  | ACATGCATGCCAGGAAACAGCTATGAC             |

**Table S4. Primers for constructing miniscaffoldin I expression cassette in pUC19**

| Name               | Sequence                             |
|--------------------|--------------------------------------|
| GAL10p-F           | CGGAATTCCTGATTAATTACCCAGAAATAAGGC    |
| GAL10p-R           | CGGAATTCCTATATTGAATTTTCAAAAATCTTACTT |
| ADH1t-F            | ACGCGTCGACTGGACTTCTTCGCCAGAGGTTTGG   |
| ADH1t-R            | CCCAAGCTTGCATGCCGGTAGAGGTGTGTC       |
| $\alpha$ -factor-F | See Table S1                         |
| $\alpha$ -factor-R | See Table S1                         |
| Cohl-1-F           | GCTCTAGAACCAGTTGAAGCTGTAACAGCTA      |
| Cohl-1-R           | GCTCTAGATGATAGTTACTGTTCTGGGTTAACTGC  |
| Cohl-2-F           | CGGGATCCGGCGATTCTCTTAAAGTT           |
| Cohl-2-R           | CGGGATCCTTGAGTACCAGGATCTAT           |
| Cohl-3-CBD-F       | CGAGCTCGGTGTGGTAGTAGAAATTTGGCAAAG    |
| Cohl-3-CBD-R       | CGGGATCCCGGATCATCTGACGGCGGTATT       |
| DocII-F            | AACTGCAGaataaacctgtaatagaag          |
| DocII-R            | CCCAAGCTTTTACTGTGCGTTCGTAATCAC       |

F, forward; R, reverse.
